# Supplementary material for: Exploring the Utility of Recombinant Snake Venom Serine Protease Toxins as Immunogens for Generating Experimental Snakebite Antivenoms
Source: MDPI journal article supplement (doi:10.3390/toxins14070443), 2022-06-29
Supplement: s1 [file s1]

# Exploring the Utility of Recombinant Snake Venom Serine Protease Toxins as Immunogens for Generating Experimental Snakebite Antivenoms

Nessrin Alomran, Patricia Blundell, Jaffer Alsolaiss, Edouard Crittenden, Stuart Ainsworth, Charlotte A. Dawson, Rebecca J. Edge, Steven R. Hall, Robert A. Harrison, Mark C. Wilkinson, Stefanie K. Menzies and Nicholas R. Casewell

**Supplementary Table S1. The snake venoms used in SDS-PAGE gel electrophoresis and immunoblotting experiments.**

| Species                        | Sub-family | Geographical region | Venom origin  |
|--------------------------------|------------|---------------------|---------------|
| <i>Bitis arietans</i>          | Viperinae  | sub-Saharan Africa  | Nigeria       |
| <i>Bothrops asper</i>          | Crotalinae | Central America     | Costa Rica    |
| <i>Bothrops atrox</i>          | Crotalinae | South America       | Brazil        |
| <i>Bothrops jararaca</i>       | Crotalinae | South America       | Brazil        |
| <i>Crotalus atrox</i>          | Crotalinae | North America       | USA           |
| <i>Calloselasma rhodostoma</i> | Crotalinae | Southeast Asia      | Captive bred  |
| <i>Daboia russelii</i>         | Viperinae  | South Asia          | Sri Lanka     |
| <i>Deinagkistrodon acutus</i>  | Crotalinae | East Asia           | Captive bred  |
| <i>Dispholidus typus</i>       | Colubrinae | sub-Saharan Africa  | South Africa* |
| <i>Echis carinatus</i>         | Viperinae  | South Asia          | India**       |
| <i>Echis ocellatus</i>         | Viperinae  | West Africa         | Nigeria       |
| <i>Rhabdophis subminiatus</i>  | Natricinae | Southeast Asia      | Hong Kong     |
| <i>Trimeresurus albolabris</i> | Crotalinae | Southeast Asia      | Captive bred  |

\* Venom sourced commercially from Latoxan, France. \*\* Indian *Echis carinatus sochureki* venom (referred to as *E. carinatus* throughout) was collected from a single specimen that was inadvertently imported to the UK via a boat shipment of stone, and then rehoused at LSTM on the request of the UK Royal Society for the Prevention of Cruelty to Animals (RSPCA).

## (A) Nucleotide and amino acid sequences of ancrod

VIGGDECNINEHRFLVALYDSTTRNFLCGGVLIHPEWVITAKHCNKKSMVLYLGKHKQSVKFDDEQERFPKEKHFIRC�KPRTRWGEDIMLIRLNKPVNNEHIAPI  
LSLPSNPPIVGSVCRVMGWGSINKYIDVLPDEPRCANINLYNTVCRGVFPRIPKSKILCAGDLQGRLDSCHCDSGGPLICSEEFHGIVYRGPNPCAQDPKPALYT  
NIFDHLHWILSIMAGNATCYP

seq primer Fcmut1:5'  
CCTAGACTCAGCCGGCTCTCCACGCTTTGCCTGACCTGCTTGTTCGTTTCTGTTCTGCGCCGTTACAGATCCAAG  
START  
CTGTGACCGGCGCCTACCTGAGATCACCGCGAAGGAGGGCCACCATGTACAGGATGCAACTCCTGTCTTGATTGCACTAAGTCTTGCACTT  
EcoRI  
AATGCGAATTCGTATTGGAGGTGATGAATGTAACATAAATGAACATCGTTTCCTTGTAGCCTTGATGACAGTACGACTCGGAATTTTCTGTGGTGGG  
GTTTTGATCCATCCGGAATGGGTGATCACTGCTAAACTGCAACAAGAAAAGTATGGTCTATACCTTGGTAAGCATAAACAAAGTAAAAATTGACGA  
TGAGCAGGAAAGATTCCCAAAGGAGAAGCACTTTATTCGTGTAAACAACCCCGTACCAGATGGGGCGAGGACATCATGTTGATCAGGCTGAACAAACCT  
GTTAACAACAGTGAACACATCGCTCCTCTCAGCTTGCCTTCAACCCCTCCATTGTGGGCTCAGTTTGCCGTGTTATGGGATGGGGCTCAATCAATAATAT  
ATAGACGTTTTGCCGATGAACCTCGTTGTGCTAATATTAACTGTACAATTACACGGTGTGCTGGAGTTTTTCCAAGGATACCAAAGAAAAGCAAAT  
ATTGTGTGCAGGTGACCTGCAAGGACGCTAGATTCATGTCAGTGTGACTCTGGGGGACCTCTCATTGTAGTGAAGAATTCATGGCATTGTATATCGGG  
GACCAATCCTTGTGCCAACCAGATAAGCCTGCCCTTACACCAACATCTTCGATCATCTTCACTGGATCCTTAGCATTATGGCAGGAAATGCAACTTGCT  
ATCCAATCACCATCACCATCACTGAGCTAGCTGGCCAGACATGATAAGATACATTGATGAGTTTGGACAAACCA  
6X his tag tail STOP/NheI seq primer Fcmut1:3'

## (B) Nucleotide and amino acid sequences of Batroxobin

MYRMQLLSICIALSLALVTEFVIGGDECNINEHPFLAFMYSPRYFCGMTLINQEWVLTAAHCNRRFMRIHLGKHAGSVANYDEVVRYPEKFICPNKKKNVITDK  
DIMLIRLDRPVKNSEHIAPLSLPSNPSPVGSVCRIMGWGAITTSEDTYPDVPHCANINLFNNTVCREAYNGLPAKTLCAVLQGGIDTCGGDSGGPLICNGQFQGI  
LSWGSDPCAEPKPAFYTKVFDYLPWIQSIAGNKTATCP

seq primer Fcmut1:5'  
CCTAGACTCAGCCGGCTCTCCACGCTTTGCCTGACCTGCTTGTTCGTTTCTGTTCTGCGCCGTTACAGATCCAAG  
START  
CTGTGACCGGCGCCTACCTGAGATCACCGCGAAGGAGGGCCACCATGTACAGGATGCAACTCCTGTCTTGATTGCACTAAGTCTTGCACTT  
EcoRI  
AATGCGAATTCGTATTGGAGGTGATGAATGTGACATAAATGAACATCCTTTCCTTGCAATCATGTACTACTCTCCCGGTATTTCTGTGGTATGACTTTGAT  
CAACCAAGGAATGGGTGCTGACCGTGCACACTGTAACAGGAGATTATGCGCATACACCTTGGTAAACATGCCGGAAGTGTAGCAAAATTATGATGAGGTG  
GTAAGATACCCAAAGGAGAAGTTCATTTGTCCAATAAGAAAAAAATGTCAACGACAAAGGACATTATGTTGATCAGGCTGGACAGACCTGTCAAAA  
ACAGTGAACACATCGCGCTCTCAGCTTGCCTTCAACCCCTCCAGTGTGGGCTCAGTTTGCCGTATTATGGGATGGGGCGCAATCACAACCTCTGAAGAC  
ACTTATCCCGATGTCCCTATTGTGCTAACATTAACTGTTCAATAATACGGTGTGCTGGAAGCTTACAATGGGTTGCCGGCGAAAACATTGTGTGCAGG  
TGTCTGCAAGGAGGCATAGATACATGTGGGGGTGACTCTGGGGGACCCCTCATCTGTAATGGACAATTCAGGGCATTTTATCTTGGGGAAGTGATCCC  
TGTGCCGAACCGCTAAGCCTGCCTTACACCAAGGTCTTGATTATCTTCCCTGGATCCAGAGCATTATTGCAGGAAATAAACTGCGACTTGCCCGCAT  
CACCATCACCATCACTGAGCTAGCTGGCCAGACATGATAAGATACATTGATGAGTTTGGACAAACCA  
6X his tag tail STOP/NheI seq primer Fcmut1:3'

## (C) Nucleotide and amino acid sequences of RVV-V

VVGGDECNINEHPFLVALYTSASSTIHCAGALINREWVLTAAHCDRRNIRIKLGMHSKNIRNEDEQIRVPRGKYFCLNTKFPNGLDKDIMLIRLRPVYSTHIAPI  
SLPSRSGVGSRCRIMGWGKISTTETDYPDVPHCTNIFIVKHKWCEPLYPWVPADSRTLCAILKGGRTCKGDSGGPLICNGEMHGIVAGGSEPCGQHLKPAV  
YTKVFDYNNWIQSIAGNRTVTCP

seq primer Fcmut1:5'  
CCTAGACTCAGCCGGCTCTCCACGCTTTGCCTGACCTGCTTGTTCGTTTCTGTTCTGCGCCGTTACAGATCCAAG  
START

CTGTGACCGGCGCCTACCTGAGATACCGGCGAAGGAGGGCCACCATGTACAGGATGCAACTCCTGTCTTGCACTGAAGTCTTGCACTT  
 EcoRI  
 AATGCGAATTCGTCGTTGGAGGTGATGAATGTAACATAAATGAACATCCTTTCCTTGTAGCCTTGATACCTCTGCCTCTAGCACGATTCACTGTGCTGGTG  
 CTTTGATCAACAGGGAATGGGTGCTACCGCTGCACACTGTGACAGGAGAAATATCCGGATAAAGCTTGGTATGCATAGCAAAAATATACGAAATGAGG  
 ATGAGCAGATAAGAGTCCCAAGGGGCAAGTACTTTTGTCTTAATACCAAATCCCCAACGGATTAGATAAGGACATCATGTTGATCAGGCTGAGAAGACC  
 TGTACCTACAGTACACATCGCGCTGTCAGCTTGCCTTCCCGTTCTCGCGGTGTGGGCTCACGTTGCCGTATTATGGGATGGGGCAAAATCTCAACTAC  
 TGAAGATACTTATCCTGATGTCCCTCATTGTACTAACATCTTCATAGTCAAGCATAAGTGGTGTGAACCACTTTATCCATGGGTGCCTGCTGATAGCAGAAC  
 ATTGTGTGCTGGTATCCTAAAAGGAGGCAGAGATACATGTAAGGGTGACTCTGGGGGACCGCTCATCTGTAATGGAGAAATGCACGGCATTGTAGCTGG  
 GGGGTCTGAACCTTGTGGCCAACATCTTAAACCTGCTGTCTACACCAAGGTCTTCGATTATAATAACTGGATCCAGAGCATTATTGCAGGAAATAGAAGT  
 TGACTTGCCCCCGCATCACCATCACCATCACATGCTAGCTGGCCAGACATGATAAGATACATTGATGAGTTTGGACAAACCA  
 6X his tag tail      STOP/NheI      seq primer Fcmut1:3'

**Supplementary Figure S1. Selection of SVSPs toxins for recombinant expression.** Three SVSPs toxins were selected for recombinant expression as biologically active and functionally relevant components of distinct viper venoms. Coding sequences were sourced from the GenBank database of the National Centre for Biotechnology Information and signal peptides were removed. **(A)** Ancrod from *C. rhodostoma* (GenBank: L07308.1), **(B)** Batroxobin from *B. atrox* (GenBank: J02684.1) and **(C)** RVV-V from *D. russelii* (GenBank: MF289120.1). The restriction enzymes used were EcoRI (cut site: 5'-GAATTC-3') and NheI (cut site: 5'-GCTAGC-3'). 6X his tag tail (CATCACCATCACCATCAC). Primers used were Fcmut1:5' (ACCCTGCTTGCTCAACTCT) and Fcmut1:3' (TGAGTTTGGACAAACCA).

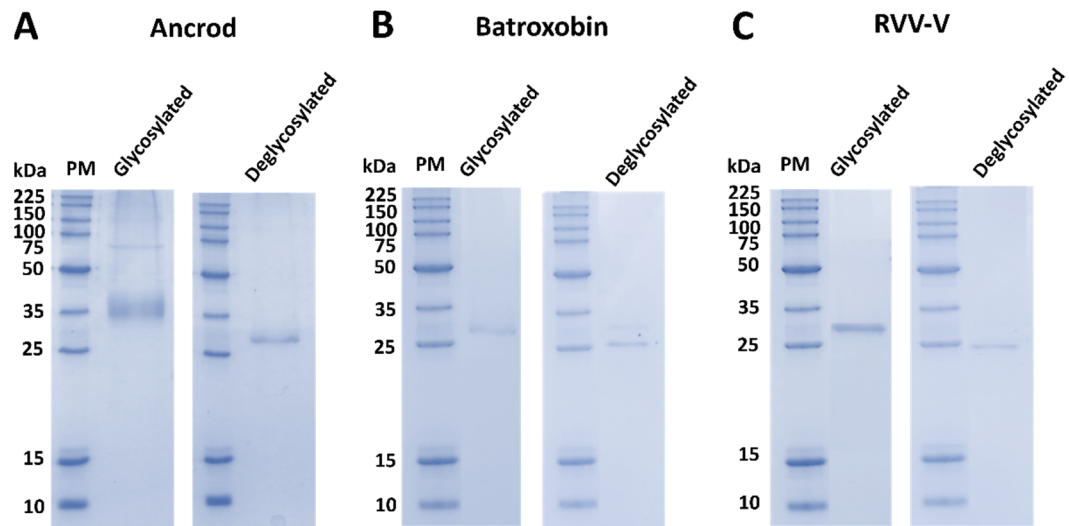

**Supplementary Figure S2. Coomassie-stained SDS-PAGE gels of glycosylated/deglycosylated recombinant toxins.** Glycosylated/deglycosylated recombinant toxins (all 7  $\mu$ g) were separated by reduced 15% SDS-PAGE gel electrophoresis and visualised by Coomassie blue staining. Deglycosylated recombinant toxins (7  $\mu$ g) were generated via incubation with PNGase F at 37 °C overnight. **(A)** Ancrod, **(B)** Batroxobin, and **(C)** RVV-V. For each, the following layout was used: Lane 1, protein marker (PM); Lane 2, glycosylated recombinant toxin; Lane 3, protein marker; Lane 4, deglycosylated recombinant toxin.

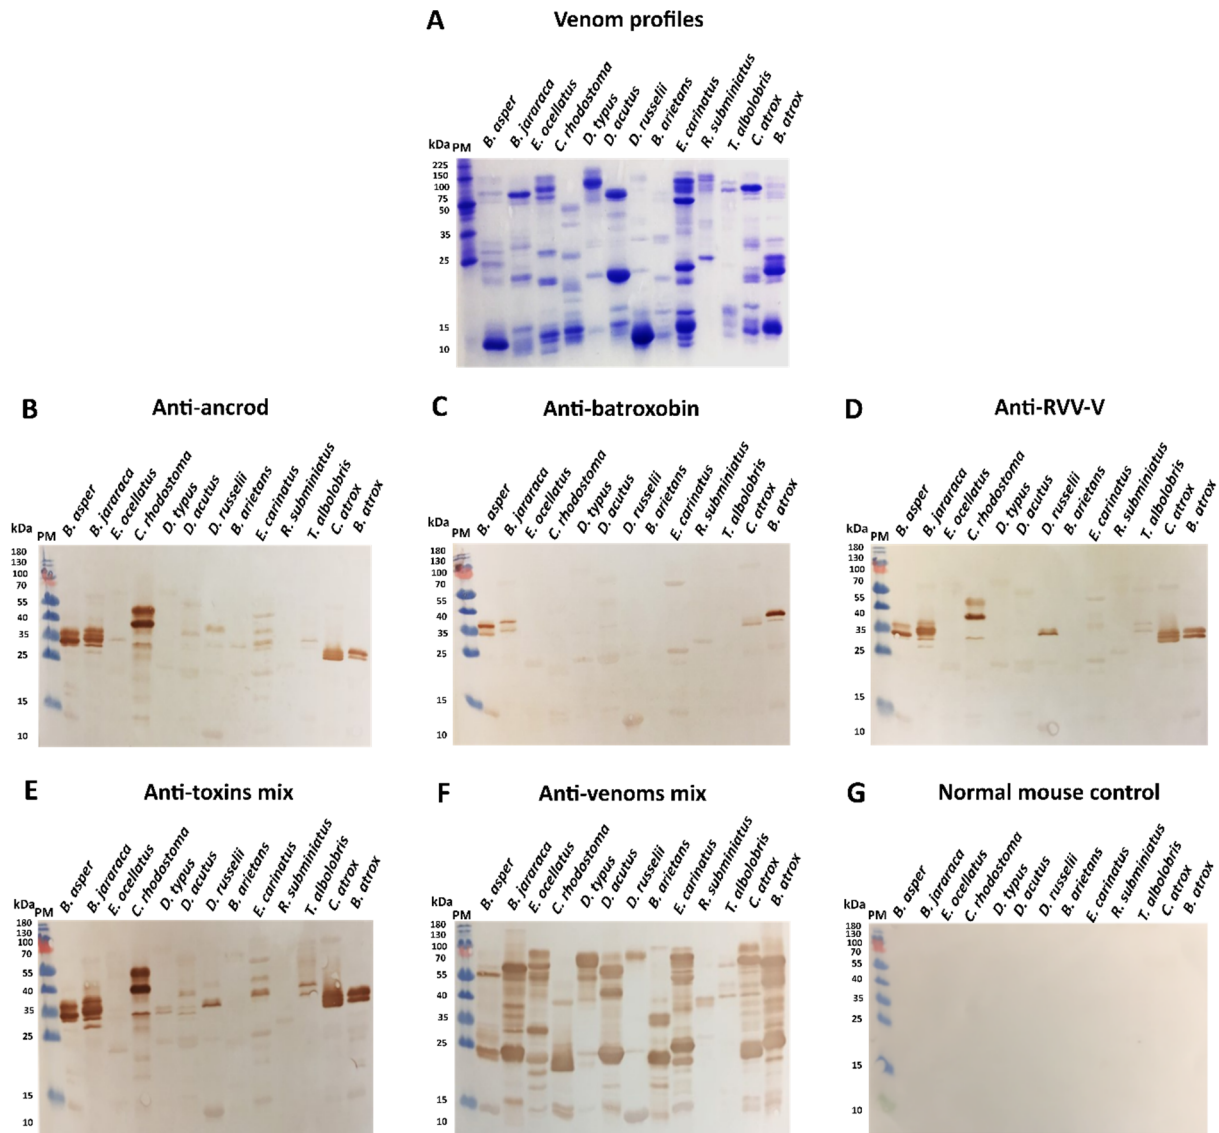

**Supplementary Figure S3. Immunological recognition of proteins found in a diverse array of haemotoxic snake venoms by the experimental antivenoms. (A)** Snake venoms were separated by reduced 15% SDS-PAGE gel electrophoresis and visualised by Coomassie blue staining. The same venom samples were transferred to nitrocellulose membranes for immunoblotting experiments and incubated with 1:5,000 dilutions of primary antibodies of each of the experimental antivenoms, specifically: **(B)** anti-ancrod, **(C)** anti-batroxobin, **(D)** anti-RVV-V, **(E)** anti-toxins mix, **(F)** anti-venoms mix (as positive control) and **(G)** normal mouse control (as negative control). PM indicates protein marker.

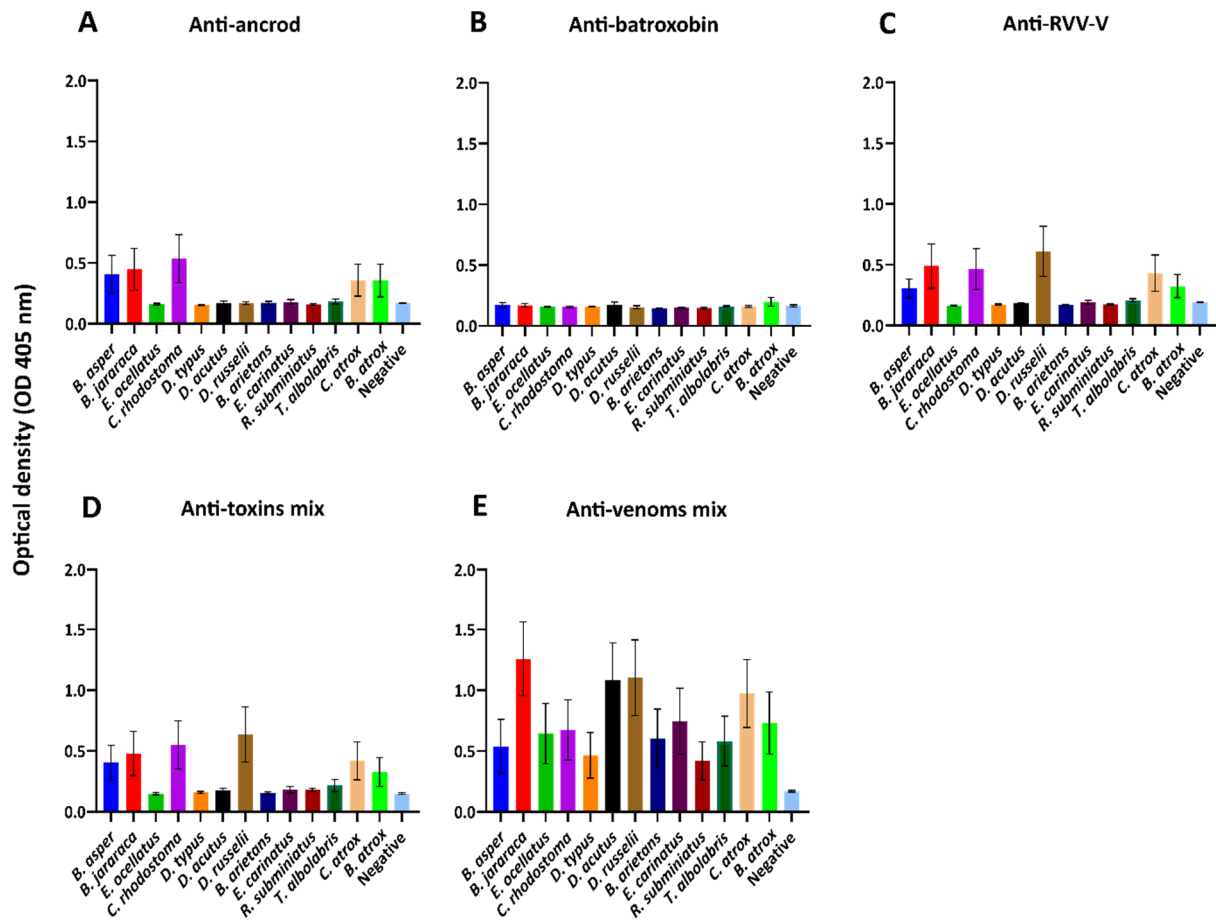

**Supplementary Figure S4. Immunological cross-reactivity of the experimental antivenoms with a diverse array of haemotoxic snake venoms.** The various experimental antivenoms were standardized to a 1:5,000 dilution and used as primary antibodies with the mean data shown and error bars representing standard deviation (SD) of the duplicate measurements. Data shown represents binding levels by: **(A)** anti-ancrod, **(B)** anti-batroxobin, **(C)** anti-RVV-V, **(D)** anti-toxins mix and **(E)** anti-venoms mix (as positive control) experimental antivenoms. Normal mouse control was used as a negative control and is displayed in each panel.

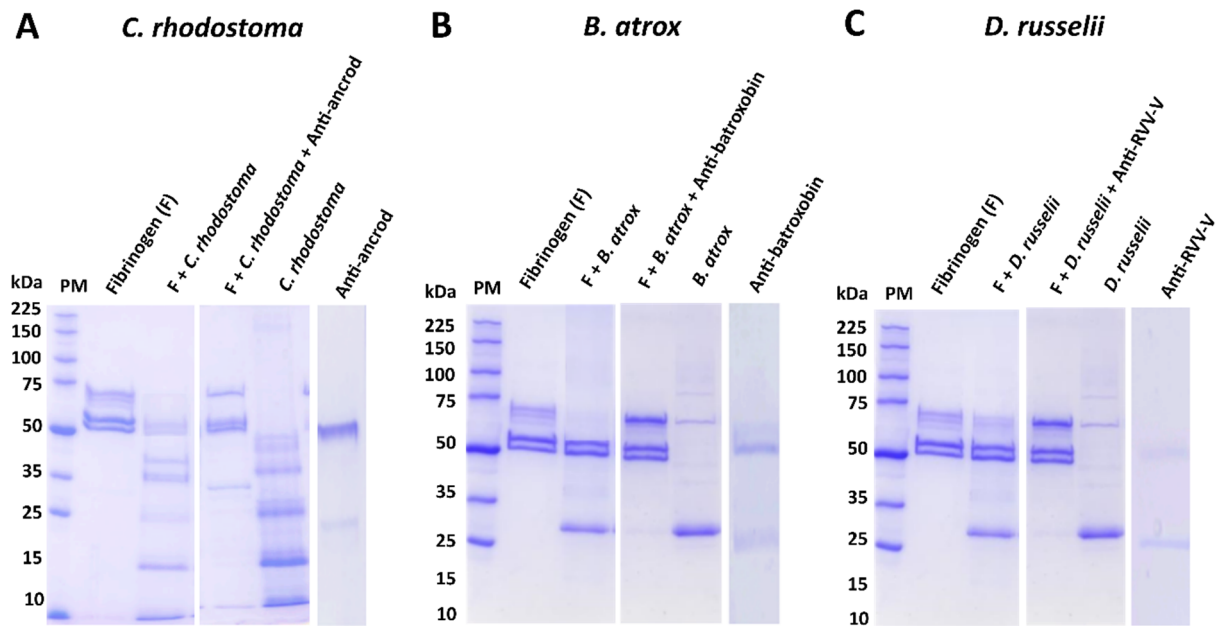

**Supplementary Figure S5. Experimental antivenoms directed against recombinant SVSP toxins show a degree of inhibition against the fibrinogenolytic activity of snake venoms.** Degradation SDS-PAGE gel electrophoretic profiles are displayed following the incubation of various samples at 37 °C for 120 min. Panels show different data obtained with the different snake venoms used as controls: **(A)** *C. rhodostoma*, **(B)** *B. atrox*, and **(C)** *D. russelii*. For each, the following layout was used: Lane 1, protein marker (PM); Lane 2, human fibrinogen (3 µg); Lane 3, fibrinogen + venom (7 µg, *C. rhodostoma*, *B. atrox* or *D. russelii*); Lane 4, fibrinogen + venom + experimental antivenom (0.5 µg, anti-ancrod, anti-batroxobin or anti-RVV-V); Lane 5, venom only; Lane 6, specific experimental antivenom only.

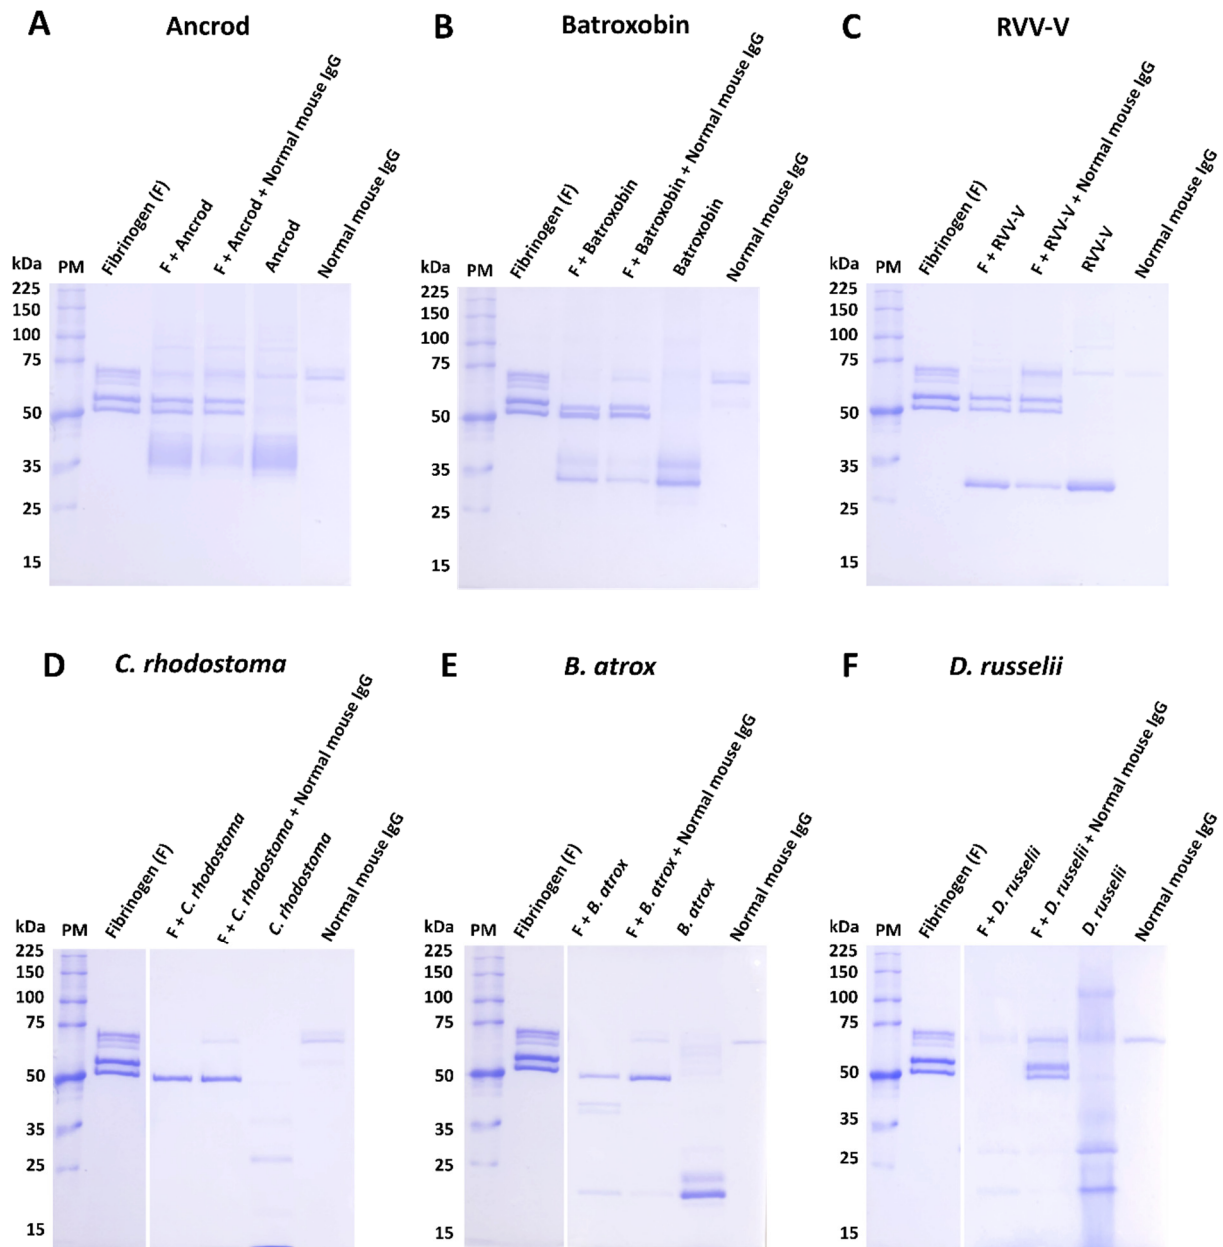

**Supplementary Figure S6. Normal non-immunised mouse IgG provides no protective effect against the fibrinogenolytic activity of recombinant toxins and snake venoms.** Degradation SDS-PAGE gel electrophoretic profiles are displayed following the incubation of various samples at 37 °C for 120 min. Panels show different data obtained with the different recombinant toxins and snake venoms used as immunogens: **(A)** ancrod, **(B)** batroxobin, **(C)** RVV-V, **(D)** *C. rhodostoma* venom, **(E)** *B. atrox* venom, and **(F)** *D. russelii* venom. For each, the following layout was used: Lane 1, protein marker (PM); Lane 2, human fibrinogen (3 µg); Lane 3, fibrinogen + toxin/venom (7 µg, ancrod, batroxobin, RVV-V, *C. rhodostoma*, *B. atrox* or *D. russelii*); Lane 4, fibrinogen + toxin/venom + normal mouse control (0.5 µg, 1 mg/ml); Lane 5, toxin/venom only; Lane 6, normal mouse control IgG only.



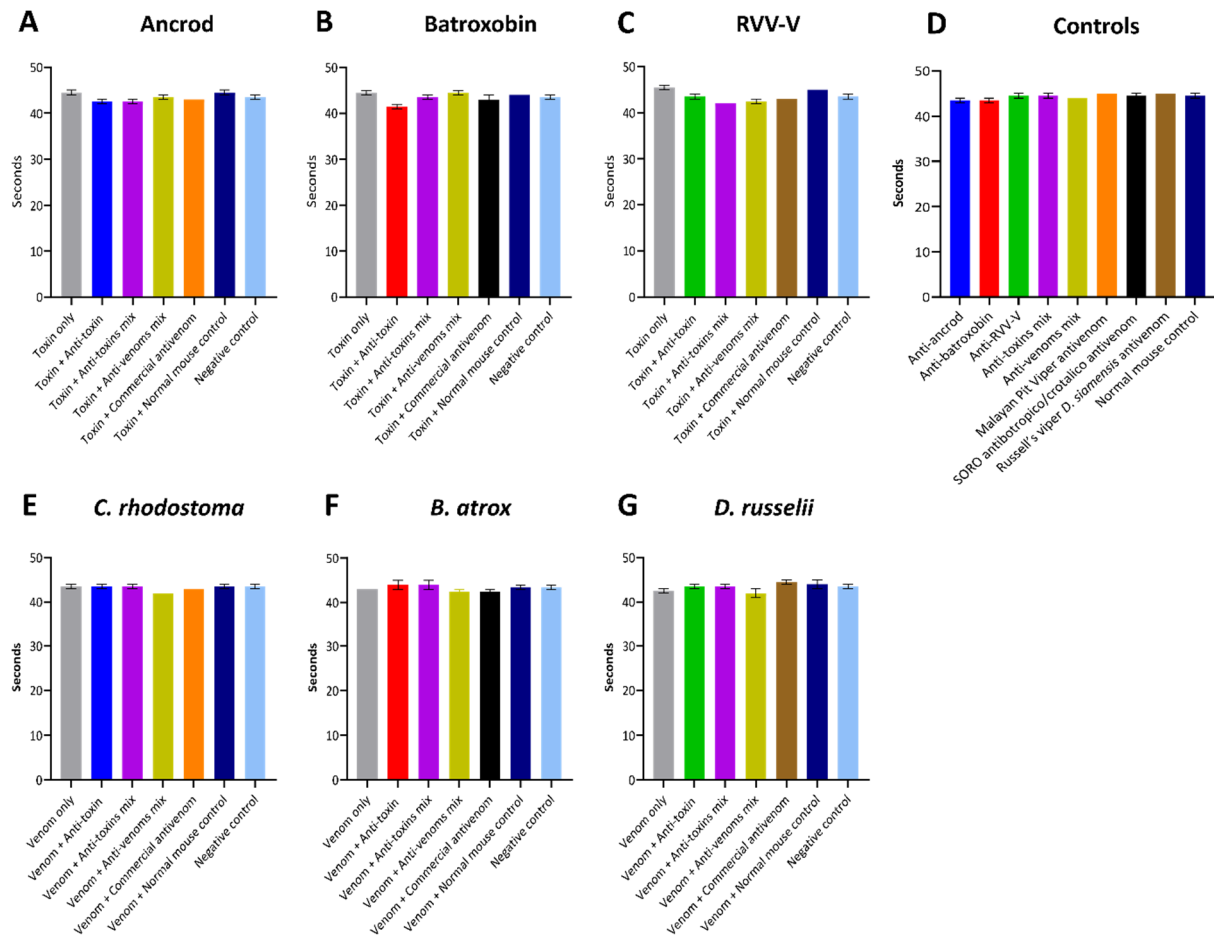

**Supplementary Figure S7. Inhibition of coagulation disturbances defined by the activated partial thromboplastin time (aPTT).** The assay measured the combined effect of the clotting factors of the intrinsic and common coagulation pathways (in seconds) in the presence of the recombinant toxins and their recovery effect by adding specific experimental antivenoms/specific commercial antivenoms (Monovalent equine antivenom for Malaysian Pit Viper against ancrod and *C. rhodostoma*, SORO antibiotropico/crotalico antivenom against batroxobin and *B. atrox* and monovalent equine *D. siamensis* commercial antivenom against RVV-V and *D. russelii*) and the normal mouse control incubated with FFP. Data shown represents the following immunogens: **(A)** Ancrod, **(B)** Batroxobin, **(C)** RVV-V, **(D)** the controls, **(E)** *C. rhodostoma* venom, **(F)** *B. atrox* venom and **(G)** *D. russelii* venom. Each experimental antivenom alone, each commercial antivenom alone and normal mouse control alone were used as negative controls. Error bars represent the standard deviation (SD) of duplicate measurements.
